# Supplementary material for: Metabolic changes in Medaka fish induced by cyanobacterial exposures in mesocosms: an integrative approach combining proteomic and metabolomic analyses
Source: PubMed Central journal article supplement (PMC5481417; doi:10.1038/s41598-017-04423-z), 2017-06-22

# Supporting information

## **Metabolic changes in fish induced by cyanobacterial exposures in mesocosms: an integrative approach combining proteomic and metabolomic analyses.**

Benoît Sotton 1\*, Alain Paris 1, Séverine Le Manach 1, Alain Blond 1, Gérard Lacroix 2,3, Alexis Millot 3, Charlotte Duval1, Hélène Huet 4, Qin Qiao 1, Sophie Labrut 5, Giovanni Chiappetta 6, Joelle Vinh 6, Arnaud Catherine 1, Benjamin Marie 1

1. UMR 7245 MNHN/CNRS Molécules de communication et adaptation des microorganismes, équipe Cyanobactéries, Cyanotoxines et Environnement, Muséum National d'Histoire Naturelle, 12 rue Buffon, F-75231 Paris Cedex 05, France.

2. UMR iEES Paris (CNRS, UPMC, INRA, IRD, AgroParisTech, UPEC), Institute of ecology and environmental sciences - Paris, Université Pierre et Marie Curie, Paris, France.

3. UMS 3194 - CEREEP Ecotron IDF (CNRS, ENS), Saint-Pierre-Lès-Nemours, France.

4. Université Paris-Est, Ecole Nationale Vétérinaire d'Alfort, BioPôle Alfort, F-94704 Maisons-Alfort Cedex, France.

5. ONIRIS, Plateforme de diagnostic et de service d'anatomie pathologie, Ecole Vétérinaire, Agroalimentaire et de l'alimentation, Nantes, France.

6. USR 3149 ESPCI/CNRS SMPB, Laboratory of Biological Mass Spectrometry and Proteomics, ESPCI Paris Tech, PSL Research University, Paris, France.

2 supplementary tables

3 supplementary figures

Supplementary Table 1: Complete list of proteins that are significantly dysregulated by cyanobacterial treatments compared to control in female livers.

| Name                                     | Function                       | Accession Number | Log2(Fold-change) |      |
|------------------------------------------|--------------------------------|------------------|-------------------|------|
|                                          |                                |                  | N-mcy             | Mcy  |
| Calmodulin 3b                            | Calcium binding                | I6L4R5           | 0.3               | 0.2  |
| Serum lectin isoform 3                   | Carbohydrate binding           | H2LG01           | 0.6               | 0.4  |
| Alpha-amylase                            | Carbohydrate metabolism        | H2N0D4           | 0.2               | 0.3  |
| Asialoglycoprotein receptor 2-like       | Carbohydrate metabolism        | H2MXH8           | 0.0               | 0.4  |
| Chitinase acidic 1                       | Carbohydrate metabolism        | H2M494           | 1.3               | 0.4  |
| Enolase 1a                               | Carbohydrate metabolism        | H2LLZ8           | 0.3               | 0.2  |
| Glutamine-fructose-6-P transaminase 1    | Carbohydrate metabolism        | H2M6R6           | -0.3              | -0.3 |
| Glycerol-3-phosphate dehydrogenase 1a    | Carbohydrate metabolism        | H2MAL3           | 0.2               | 0.3  |
| Sialic acid acetyltransferase            | Carbohydrate metabolism        | H2MHU5           | 0.2               | -0.3 |
| Scavenger receptor B2                    | Cell adhesion                  | H2L3X8           | 0.5               | 0.2  |
| N-myc downstream regulated 1a            | Cell proliferation             | H2LER5           | 0.1               | 0.3  |
| Ubiquitin-like enzyme 7                  | Cellular process               | H2LED8           | -0.3              | -0.2 |
| Glutathione peroxidase 3                 | Detoxification                 | M1H6G2           | 0.3               | 0.3  |
| Glutathione S-transferase 1.2            | Detoxification                 | H2M5R1           | -0.4              | -0.1 |
| Glutathione S-transferase 2              | Detoxification                 | H2LN28           | 0.3               | 0.3  |
| Glutathione S-transferase kappa 1        | Detoxification                 | H2M9B4           | 0.0               | 0.3  |
| Glutathione S-transferase rho            | Detoxification                 | H2MF28           | -0.3              | -0.1 |
| Glutathione S-transferase theta 1a       | Detoxification                 | H2N2A9           | 0.0               | 0.7  |
| Glutathione S-transferase theta 1a       | Detoxification                 | H2MWI7           | -0.5              | 0.3  |
| Collagen alpha 1b                        | Extracellular matrix component | H2M6N2           | 0.1               | 1.9  |
| Collagen type I alpha 2                  | Extracellular matrix component | H2LHF2           | 0.2               | 1.3  |
| Collagen, type I, alpha 1a               | Extracellular matrix component | A8QX86           | 0.0               | 1.4  |
| Hydroxysteroid (17-beta) dehydrogenase 4 | Gonad development              | H2LEQ2           | 0.2               | 0.3  |
| Heme binding protein 2                   | Heme transport                 | H2MFD7           | 0.4               | 0.3  |
| Heme binding protein 2-like              | Heme transport                 | H2LNC6           | 0.4               | 0.3  |
| Hemoglobin alpha                         | Heme transport                 | H2LKL6           | 0.3               | 0.2  |
| Hemoglobin alpha 1                       | Heme transport                 | H2LD06           | 0.5               | 0.2  |
| hemoglobin beta 1                        | Heme transport                 | Q8JIM9           | 0.3               | 0.0  |
| Hemopexin WP65                           | Heme transport                 | Q8JIP9           | 0.7               | 0.0  |
| Myoglobin                                | Heme transport                 | I1SRL0           | 2.4               | 0.5  |
| Myosin heavy chain 6                     | Heme transport                 | C6L8J0           | 1.2               | 0.0  |
| Myosin light chain 10                    | Heme transport                 | B9ZQZ5           | 1.2               | 0.0  |
| D-dopachrome tautomerase                 | Immunity                       | H2M5M8           | 0.3               | 0.4  |
| Transferrin-a                            | Ion transport                  | H2MPL0           | 0.6               | 0.2  |
| Annexin A1a                              | Lipid metabolism               | O93446           | -0.1              | -0.3 |
| Apolipoprotein A-Ia                      | Lipid metabolism               | H2MLX9           | 0.3               | 0.1  |
| Apolipoprotein A-II                      | Lipid metabolism               | H2MG18           | 0.4               | 0.1  |
| Apolipoprotein Bb                        | Lipid metabolism               | H2MBD1           | 0.4               | 0.3  |
| Apolipoprotein Eb                        | Lipid metabolism               | H2MG05           | 0.4               | 0.4  |
| Fatty acid binding protein 11a           | Lipid metabolism               | H2M559           | -0.4              | -0.4 |
| Fatty acid binding protein 3             | Lipid metabolism               | H2M7N9           | 0.5               | 0.4  |
| Fatty acid binding protein 7a            | Lipid metabolism               | H2ME97           | 0.0               | -0.3 |
| Fatty acid synthase                      | Lipid metabolism               | A0A0F7G9Q9       | 0.5               | 0.2  |
| Prostaglandin D2 synthase 21kDa          | Lipid metabolism               | H2LQH0           | 1.0               | 0.5  |
| Prostaglandin D2 synthase b              | Lipid metabolism               | H2LSA0           | 0.6               | 0.3  |
| Signal sequence receptor alpha           | Membrane component             | H2LDF6           | 0.3               | 0.2  |
| Signal sequence receptor delta           | Membrane component             | H2LS18           | -0.1              | -0.3 |
| Transmembrane protein 214                | Membrane component             | H2MTM5           | -0.1              | -0.3 |
| 3-oxoacid CoA transferase 1a             | Metabolism                     | H2LGX0           | -0.4              | -0.1 |
| Acetyl-CoA acyltransferase 2             | Metabolism                     | H2LBC1           | -0.4              | -0.3 |
| Aconitate 3-methyltransferase            | Metabolism                     | H2MV50           | 0.3               | 0.3  |
| Acyl-CoA dehydrogenase                   | Metabolism                     | H2LR71           | -0.4              | -0.3 |
| Acyl-CoA oxidase 1                       | Metabolism                     | H2LSA2           | 0.1               | 0.3  |
| Aldehyde dehydrogenase 9A1b              | Metabolism                     | H2M419           | -0.3              | -0.1 |
| Aspartate dehydrogenase                  | Metabolism                     | H2M788           | 0.0               | -0.4 |
| Biliverdin reductase B                   | Metabolism                     | H2L8G7           | 0.0               | 0.4  |
| Disulfide isomerase family A2            | Metabolism                     | H2LX92           | -0.1              | 0.5  |
| Disulfide isomerase family A4            | Metabolism                     | H2LSQ4           | -0.1              | -0.3 |
| Phosphohistidine phosphatase-like        | Metabolism                     | H2MQA7           | -0.3              | -0.1 |
| Retinol binding protein 1a               | Metabolism                     | H2MAD5           | 0.4               | 0.4  |
| Retinol dehydrogenase 11-like            | Metabolism                     | H2LY96           | -0.3              | -0.3 |
| UDP glucuronosyltransferase 1b           | Metabolism                     | H2M746           | -0.3              | -0.2 |
| UDP glucuronosyltransferase 5c2          | Metabolism                     | H2MD16           | -0.4              | -0.2 |
| Catechol-O-methyltransferase 1           | Methylation                    | H2LXJ9           | 0.1               | 0.3  |
| Glycine N-methyltransferase              | Methylation                    | H2MY01           | 0.4               | 0.3  |
| Phosphoethanolamine methyltransferase    | Methylation                    | H2LCT1           | -0.5              | -0.3 |
| ES1 protein homolog                      | Mitochondrion                  | H2M702           | -0.4              | -0.2 |
| Histone H1                               | Nucleosome                     | H2M8F1           | 0.4               | 0.3  |
| Histone H1                               | Nucleosome                     | H2LU02           | 0.0               | 0.3  |
| Nucleic acid binding protein a           | Nucleosome                     | H2M789           | -0.3              | -0.2 |
| Adenylate kinase 2                       | Nucleotide metabolic process   | H2LT42           | -0.2              | -0.3 |
| Adenylate kinase 4                       | Nucleotide metabolic process   | H2M295           | -0.3              | -0.2 |
| Nucleoside diphosphate kinase 2b         | Nucleotide metabolic process   | H2MW80           | 0.6               | -0.1 |
| Carbonic anhydrase                       | One-carbon metabolic pathway   | H2LW18           | 0.4               | 0.2  |
| Carbonic anhydrase II                    | One-carbon metabolic pathway   | H2MBN7           | 0.4               | 0.3  |
| Methionine adenosyltransferase alpha 11b | One-carbon metabolic pathway   | H2LPD1           | -0.6              | -0.2 |
| Choriogenin H                            | Ovogenesis                     | Q8JHT8           | -0.1              | -0.4 |
| Choriogenin L                            | Ovogenesis                     | H2M2R4           | -0.1              | -0.4 |
| Vitelline membrane outer layer 1a        | Ovogenesis                     | H2LLD6           | 0.5               | 0.2  |
| Vitellogenin 1 precursor                 | Ovogenesis                     | H2LNM8           | 0.0               | -0.5 |
| Vitellogenin 3                           | Ovogenesis                     | H2LQ37           | 0.0               | -0.3 |
| Vitellogenin II precursor                | Ovogenesis                     | H2LP13           | -0.5              | -0.7 |
| Calnexin                                 | Protein folding                | H2MWK1           | -0.4              | -0.5 |
| Sec23 homolog A                          | Protein folding                | H2MDD7           | -0.3              | -0.3 |
| Alpha-2-macroglobulin 1                  | Proteolysis                    | A0A0F7G9U8       | 0.3               | 0.0  |
| Coagulation factor XI                    | Proteolysis                    | H2MEU2           | 0.8               | 0.4  |
| Complement component 1q                  | Proteolysis                    | H2MLW8           | 1.0               | 0.3  |
| Complement component 3                   | Proteolysis                    | H2MVB4           | 0.4               | 0.4  |
| Complement component 9                   | Proteolysis                    | H2LCR1           | 0.3               | 0.2  |
| Complement factor H                      | Proteolysis                    | H2MXP3           | 0.5               | 0.3  |
| Kallikrein                               | Proteolysis                    | H2MEZ4           | 0.3               | 0.2  |
| Metallo-endopeptidase M12                | Proteolysis                    | H2L3F5           | 0.7               | 0.4  |
| Proteasome beta 3                        | Proteolysis                    | H2MZ13           | -0.2              | -0.3 |
| Serine protease 59                       | Proteolysis                    | A4UWM7           | 0.3               | 0.2  |
| Serpin peptidase inhibitor A             | Proteolysis                    | H2MMF6           | 0.7               | 0.2  |
| Alcohol dehydrogenase 8a                 | Redox homeostasis              | H2MNR4           | 0.3               | 0.3  |
| Aldo-keto reductase family 7A3           | Redox homeostasis              | H2LHN4           | 0.3               | 0.5  |
| Cytochrome C oxidase 2                   | Redox homeostasis              | C6L6H1           | -0.5              | -0.3 |
| Cytochrome c oxidase Vlb2                | Redox homeostasis              | H2LVTO           | 0.3               | 0.1  |
| Cytochrome P450 2A like                  | Redox homeostasis              | H2L6R3           | -0.4              | 0.0  |
| Peroxioredoxin 1                         | Redox homeostasis              | H2M443           | 0.3               | 0.4  |
| Spectrin beta chain 1                    | Redox homeostasis              | H2MFE5           | 0.3               | 0.3  |
| Glutaminyl-tRNA synthetase               | Translation                    | H2M4U8           | -0.3              | -0.2 |
| Glycyl-tRNA synthetase                   | Translation                    | H2M0E5           | -0.3              | -0.1 |
| Leucyl-tRNA synthetase b                 | Translation                    | H2L846           | -0.2              | -0.3 |
| Nuclear ribonucleoprotein A0             | Translation                    | H2L3F3           | 0.3               | 0.3  |
| Ribosomal protein L18a                   | Translation                    | H2N0P8           | -0.2              | -0.3 |
| Ribosomal protein L28                    | Translation                    | H2LK88           | -0.2              | -0.3 |
| Ribosomal protein L3                     | Translation                    | H2L7K6           | -0.3              | -0.2 |
| Ribosomal protein L5                     | Translation                    | H2LK51           | -0.3              | -0.1 |
| Ribosomal protein P2-like                | Translation                    | H2LMY7           | 0.3               | 0.0  |
| Ribosomal protein S16                    | Translation                    | H2MNR2           | -0.2              | -0.3 |
| Ribosomal protein S23                    | Translation                    | H2MSQ6           | -0.4              | -0.3 |
| Ribosomal protein S27a                   | Translation                    | H2LBD5           | 0.3               | 0.3  |
| Ribosomal protein S9                     | Translation                    | H2M6L4           | -0.4              | -0.3 |

Supplementary Table 2: Complete list of proteins that are significantly dysregulated by cyanobacterial treatments compared to control in male livers.

| Name                                      | Function                       | Accession Number | Log2(Fold-change) |      |
|-------------------------------------------|--------------------------------|------------------|-------------------|------|
|                                           |                                |                  | N-mcy             | Mcy  |
| Glucose-6-phosphate dehydrogenase         | Carbohydrate metabolism        | H2LRX4           | -0.3              | -0.1 |
| HSP70 binding protein 21                  | Cellular process               | H2LB83           | 0.3               | 0.1  |
| Ubiquitin like                            | Cellular process               | H2TNX7           | -0.1              | 0.3  |
| Glutathione dehydrogenase III             | Detoxification                 | Q6R5I9           | 0.1               | -0.4 |
| Glutathione S-transferase theta 1a        | Detoxification                 | H2MWI7           | -0.2              | 0.4  |
| Collagen alpha 1b                         | Extracellular matrix component | H2M6N2           | 1.2               | 0.6  |
| Myosin heavy chain alpha 6                | Heme transport                 | H2MLX5           | -0.2              | 1.1  |
| Hemoglobin beta 1                         | Heme transport                 | Q8JIM9           | -0.3              | -0.1 |
| Hemoglobin alpha                          | Heme transport                 | H2LKL6           | -0.4              | -0.1 |
| Prostaglandin D2 synthase b               | Lipid metabolism               | H2LSA0           | 0.5               | 0.6  |
| Fatty acid binding protein 3              | Lipid metabolism               | H2M7N9           | 0.4               | 0.2  |
| Prostaglandin D2 synthase 21kDa           | Lipid metabolism               | H2LQH0           | 0.3               | 0.4  |
| Neutral cholesterol ester hydrolase 1a    | Lipid metabolism               | H2M8K0           | -0.2              | -0.3 |
| Fatty acid binding protein 10a            | Lipid metabolism               | A0A0F7G9G7       | -0.2              | -0.3 |
| NADH dehydrogenase 1 beta 7               | Metabolism                     | H2MIX8           | 0.3               | 0.3  |
| Succinate dehydrogenase flavoprotein A    | Metabolism                     | H2LNX5           | 0.1               | -0.3 |
| Acyl-CoA oxidase 1                        | Metabolism                     | H2LSA2           | -0.1              | -0.3 |
| Dimethylarginine dimethylaminohydrolase 1 | Metabolism                     | H2M4Q8           | -0.3              | -0.3 |
| Retinol saturase                          | Metabolism                     | H2LCC0           | -0.3              | -0.3 |
| Serine protease 59                        | Proteolysis                    | A4UWM7           | 0.7               | 0.2  |
| Tripeptidyl peptidase I                   | Proteolysis                    | H2MLP4           | 0.3               | 0.3  |
| Dipeptidyl-peptidase 7                    | Proteolysis                    | H2MTU3           | 0.3               | 0.2  |
| Alpha-trypsin inhibitor 3b                | Proteolysis                    | H2LAK3           | 0.3               | 0.3  |
| Cystatin C                                | Proteolysis                    | H2M908           | 0.3               | 0.4  |
| Complement factor H                       | Proteolysis                    | H2MXP3           | 0.1               | 0.3  |
| Spectrin beta 2                           | Redox homeostasis              | H2LT16           | 0.2               | 0.7  |
| Cytochrome P450 2W1                       | Redox homeostasis              | H2MLQ7           | 0.0               | 0.3  |
| Monoamine oxidase                         | Redox homeostasis              | H2MF43           | -0.1              | -0.3 |
| Hydroxyacid oxidase                       | Redox homeostasis              | H2MY51           | -0.3              | 0.0  |
| Ribosomal protein P2 like                 | Translation                    | H2LMY7           | 0.4               | 0.4  |

Supplementary Figure S1: Monitoring of experimental parameters linked to the presence of cyanobacteria. (A) Total Chlorophyll-*a* concentrations ( $\mu\text{g L}^{-1}$ ). (B) Estimated cyanobacterial concentrations ( $\mu\text{g eq. chl } a \text{ L}^{-1}$ ) measured by BBE probe. (C) Intracellular and extracellular microcystins concentrations ( $\mu\text{g eq. MC-LR L}^{-1}$ ) measured by ELISA in the treatment containing the MC-producing cyanobacterial strain (no MCs were detected in the other treatments). All data are represented as mean  $\pm$  standard deviation (SD) measured in tanks (n=3/treatment).

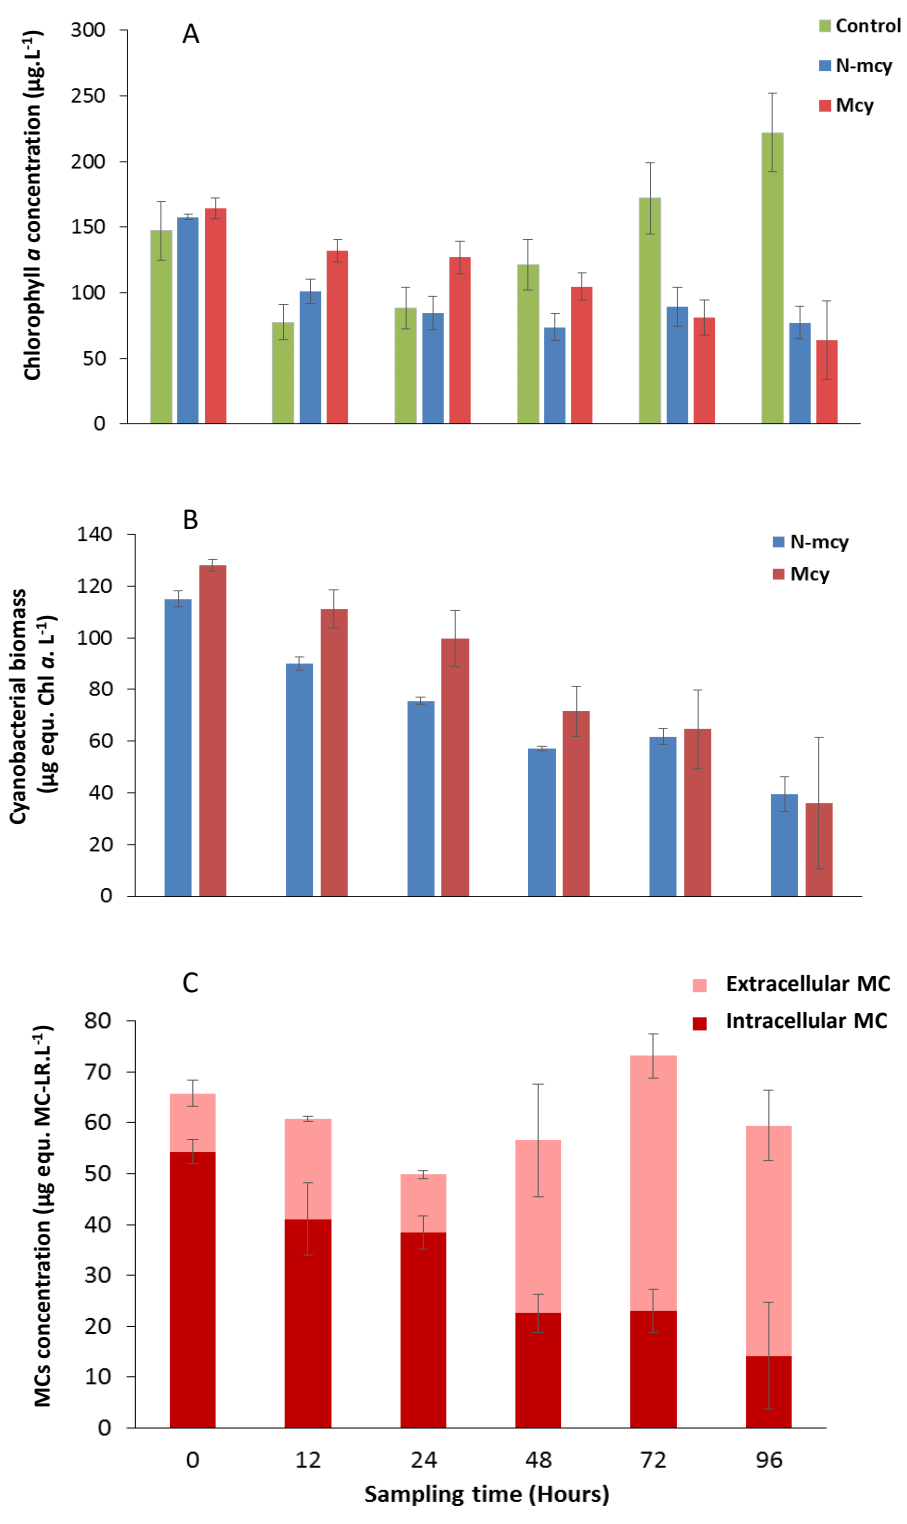



Supplementary figure S2: Light microscopy transverse sections of medaka livers, stained with hematoxylin–eosin–safran (HES) and Periodic acid–Schiff (PAS). (A) Male and (B) Female medaka.

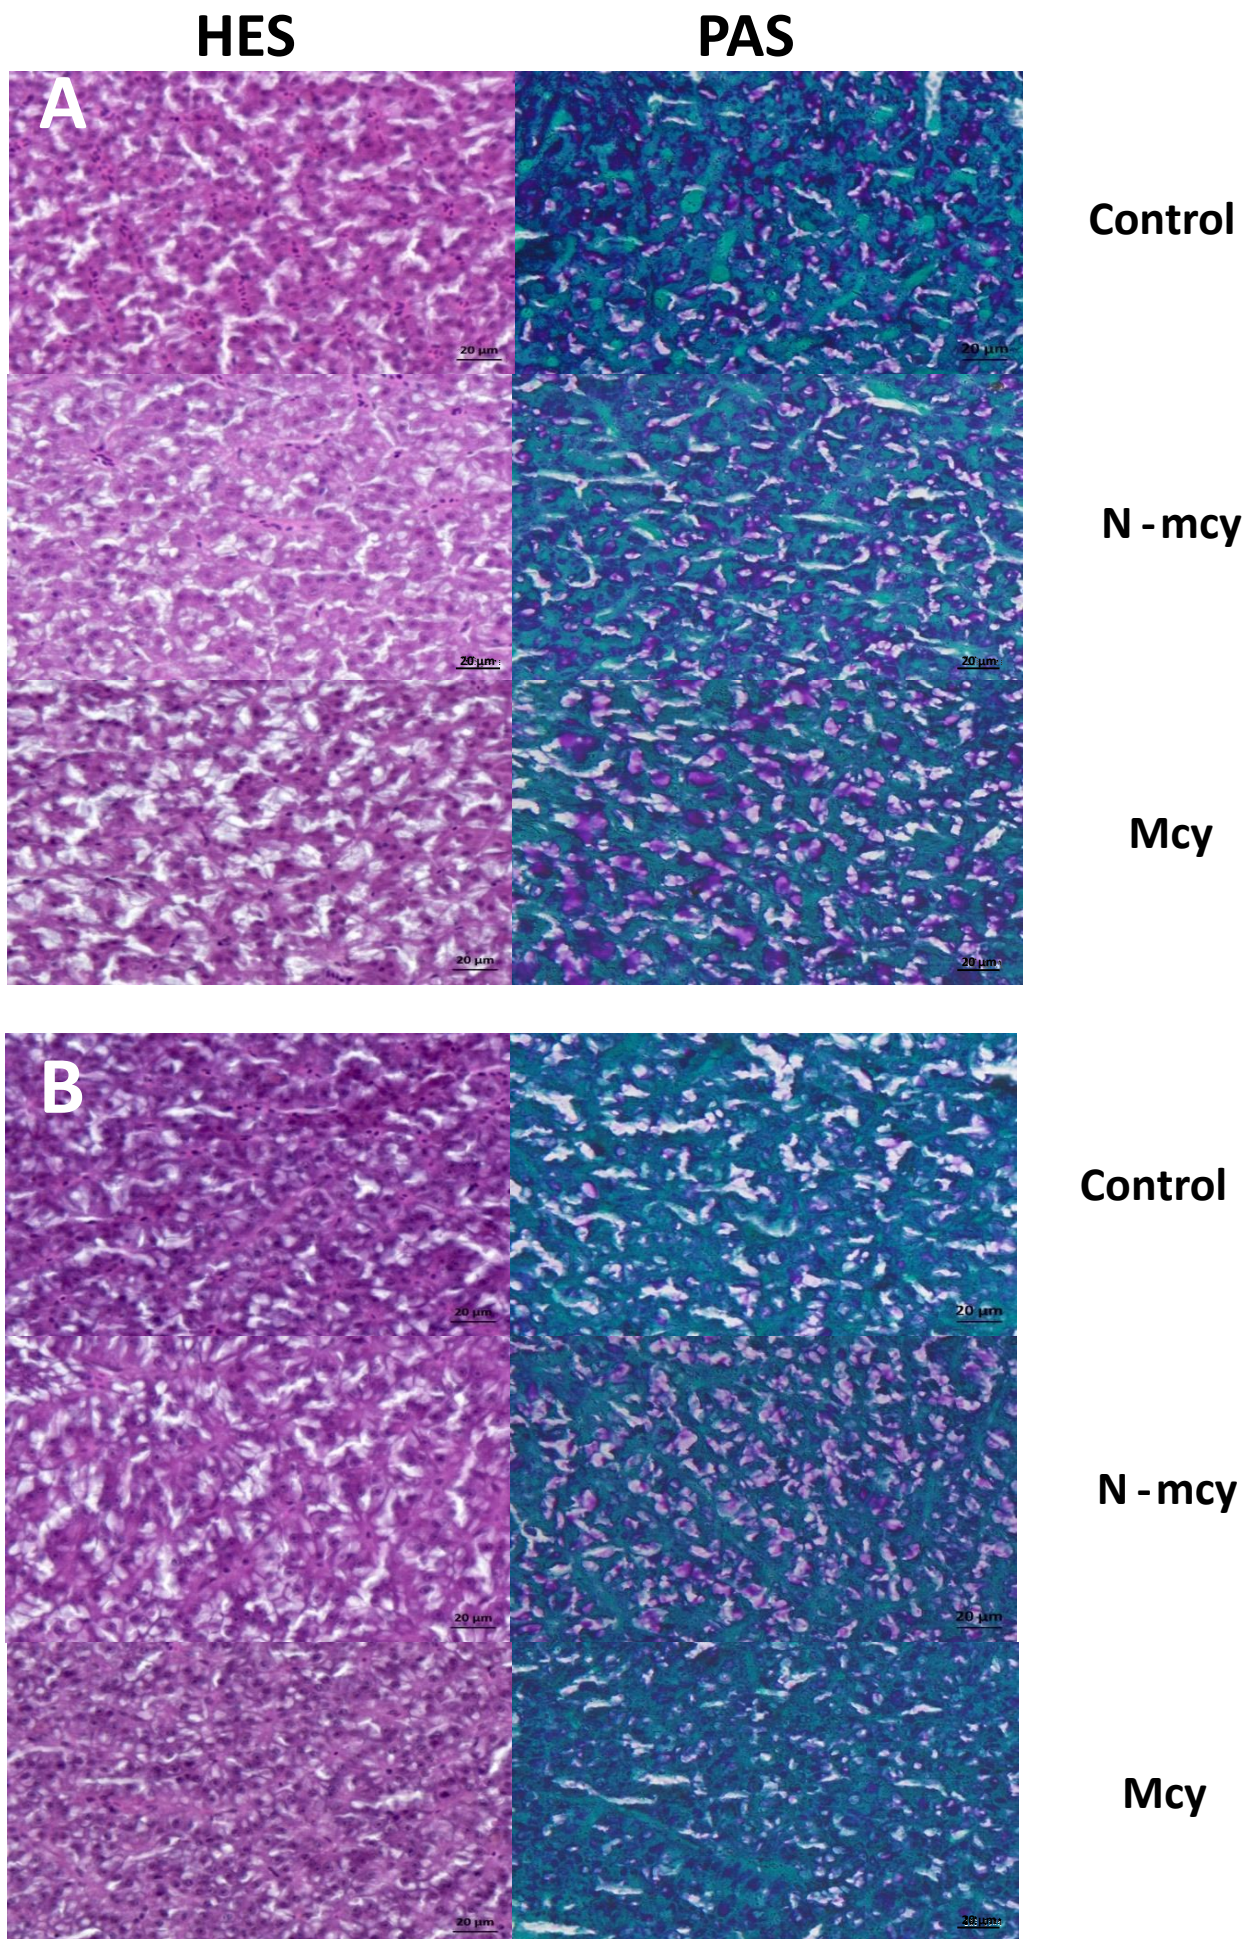

Supplementary figure S3: Venn diagram of the chemodiversity revealed by LC-ESI-Q-TOF-MS and MALDI-TOF in experimental cyanobacterial strains.

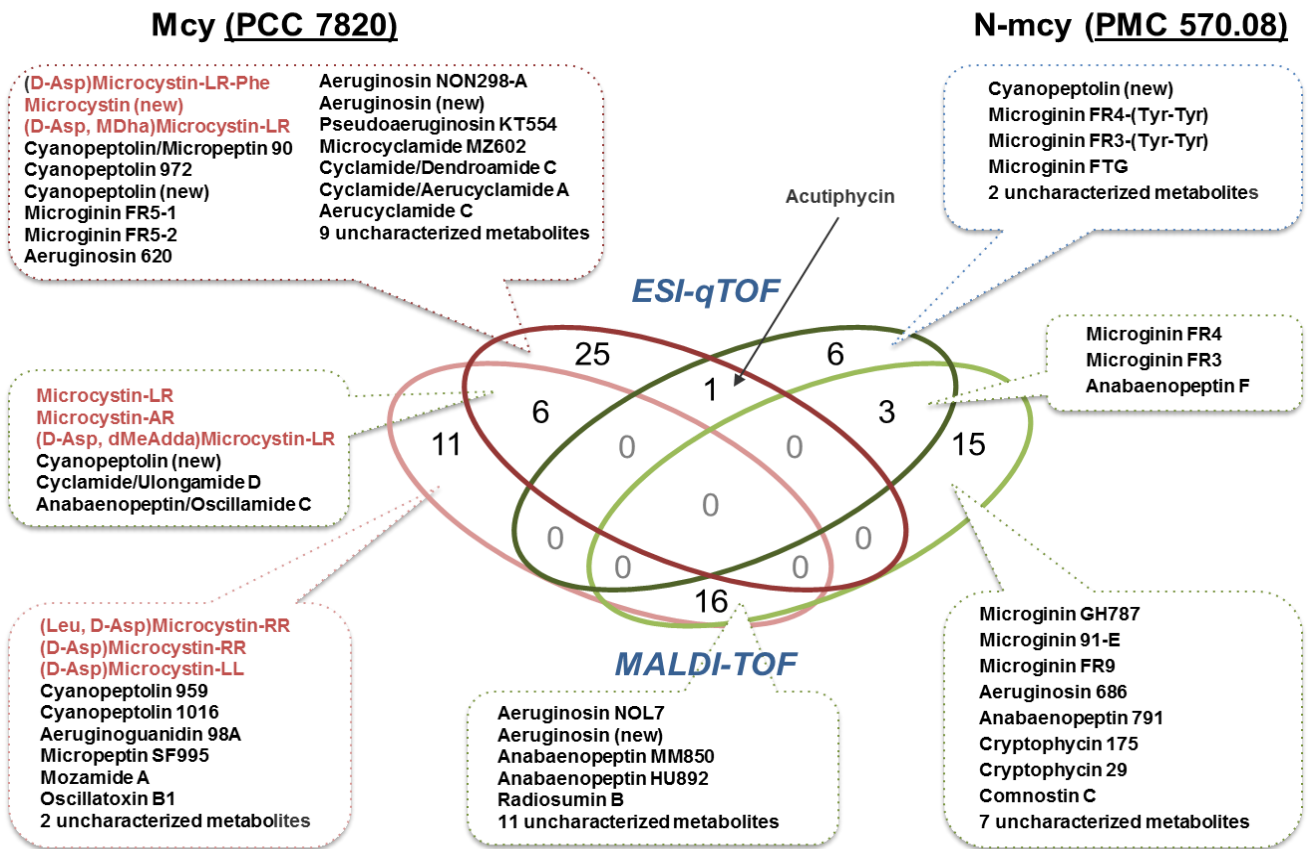

Supplement: 41598_2017_4423_MOESM1_ESM.pdf [file 41598_2017_4423_MOESM1_ESM.pdf]
